# Supplementary material for: AMG 531, a Thrombopoiesis-Stimulating Protein, for Chronic ITP
Source: Atypon-hosted journal article supplement (doi:10.1056/nejmoa054626), 2006-10-18
Supplement: nejm_bussel_sa1.pdf [file nejm_bussel_sa1.pdf]

## Supplementary Appendix

This appendix has been provided by the authors to give readers additional information about their work.

Supplement to: Bussel JB, Kuter DJ, George JN, et al. AMG 531, a thrombopoiesis-stimulating protein, for chronic ITP. *N Engl J Med* 2006;355:1672-81.

## Supplemental Figure 1

Platelet counts over time in responding patients (top) and non-responding patients (bottom) treated with AMG 531 or placebo (weekly treatment for 6 weeks). Placebo patients are indicated by a red line. The shaded area shows the targeted platelet range. Platelet counts associated with rescue medication are excluded. On average, the proportion of weekly platelet counts  $>50 \times 10^9/L$  was 50% for  $1 \mu g/kg$ , 80% for  $3 \mu g/kg$ , and 17% for placebo. The proportion of weekly platelet counts  $>100 \times 10^9/L$  was 23%, 35%, and 0%, respectively.

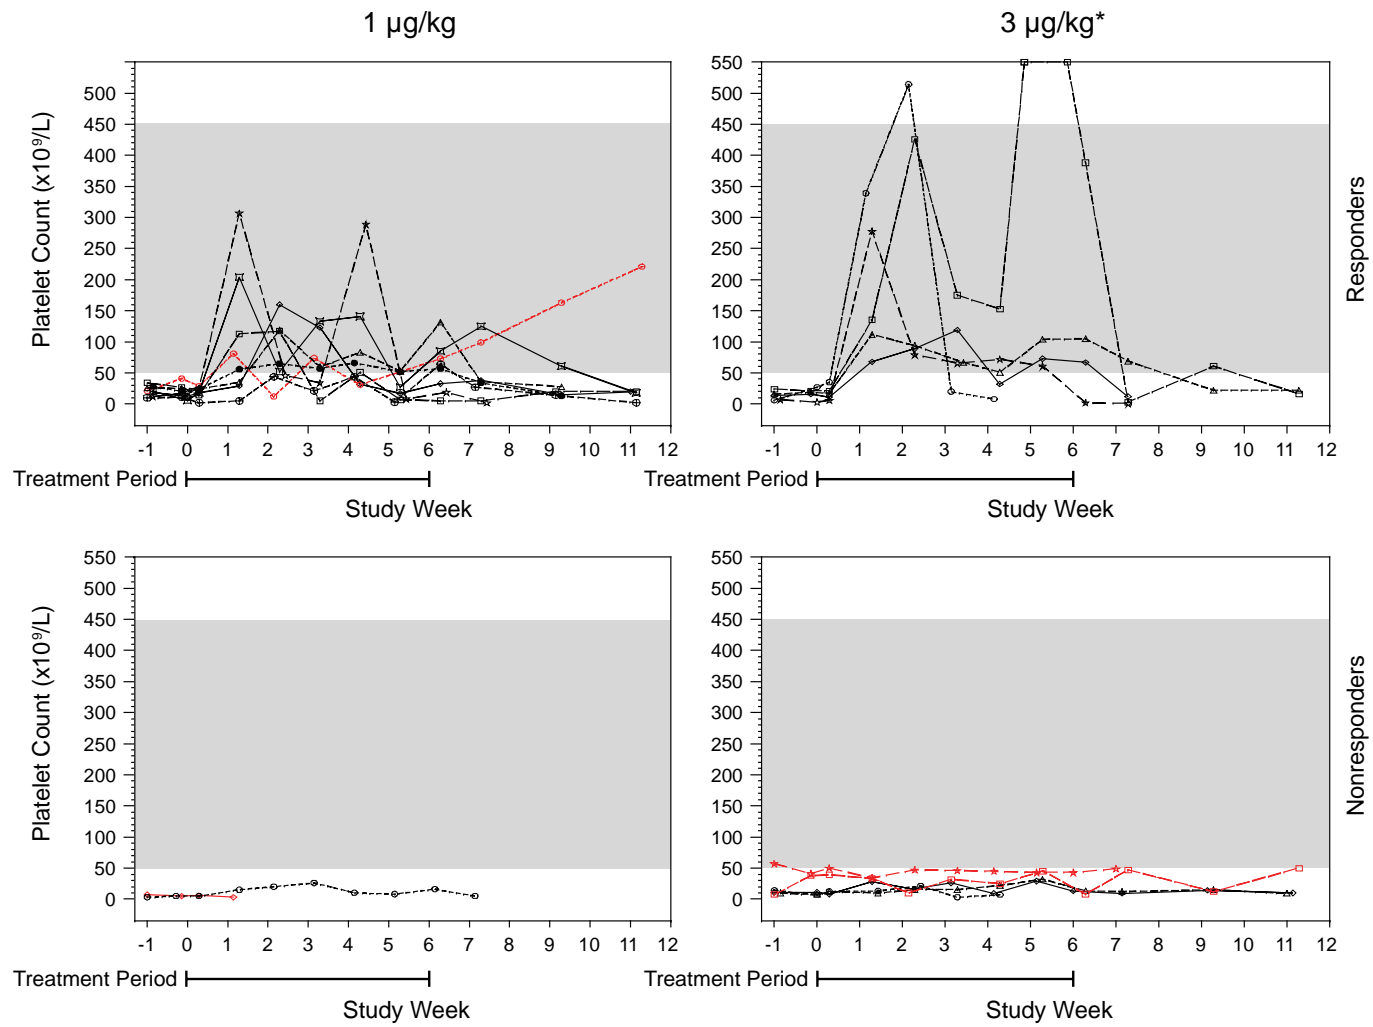

\*Patient in 3 µg/kg responder group had a platelet count of 822x10<sup>9</sup>/L at week 6 not shown on the graph.

**Supplemental FIGURE 1**

**Table Supplement. Summary of Adverse Events with an Incidence <10% in Patients Treated with AMG 531**

| Adverse Event             | Part A<br>2 administrations, 2 weeks apart |                                  | Part B<br>Weekly administration for 6 weeks |                           | Part A + Part B              |
|---------------------------|--------------------------------------------|----------------------------------|---------------------------------------------|---------------------------|------------------------------|
|                           | AMG 531                                    |                                  | AMG 531                                     |                           | AMG 531                      |
|                           | 0.2 to 1 µg/kg<br>N = 12<br>n (%)          | 3 to 10 µg/kg<br>N = 12<br>n (%) | 1 to 6 µg/kg<br>N = 17<br>n (%)             | Placebo<br>N = 4<br>n (%) | All Doses<br>N = 41<br>n (%) |
| Back pain                 | 0                                          | 2 (17)                           | 1 (6)                                       | 2 (50)                    | 3 (7)                        |
| Diarrhea                  | 0                                          | 0                                | 3 (18)                                      | 1 (25)                    | 3 (7)                        |
| Dyspnea                   | 1 (8)                                      | 1 (8)                            | 1 (6)                                       | 0                         | 3 (7)                        |
| Musculoskeletal stiffness | 2 (17)                                     | 0                                | 1 (6)                                       | 0                         | 3 (7)                        |
| Pain in extremity         | 2 (17)                                     | 0                                | 1 (6)                                       | 0                         | 3 (7)                        |

|                                   |        |        |        |        |       |
|-----------------------------------|--------|--------|--------|--------|-------|
| Pharyngolaryngeal pain            | 0      | 2 (17) | 1 (6)  | 0      | 3 (7) |
| Purpura                           | 0      | 0      | 3 (18) | 0      | 3 (7) |
| Purpura (not otherwise specified) | 2 (17) | 1 (8)  | 0      | 0      | 3 (7) |
| Stomatitis                        | 0      | 1 (8)  | 2 (12) | 2 (50) | 3 (7) |
| Upper respiratory tract infection | 0      | 0      | 3 (18) | 1 (25) | 3 (7) |
| Venipuncture site bruise          | 1 (8)  | 0      | 2 (12) | 0      | 3 (7) |
| Vaginal hemorrhage*               | 0      | 1 (11) | 1 (8)  | 1 (33) | 2 (7) |
| Abdominal pain                    | 0      | 0      | 2 (12) | 1 (25) | 2 (5) |
| Anxiety                           | 0      | 1 (8)  | 1 (6)  | 0      | 2 (5) |
| Constipation                      | 0      | 1 (8)  | 1 (6)  | 0      | 2 (5) |
| Cough                             | 1 (8)  | 1 (8)  | 0      | 0      | 2 (5) |
| Dyspepsia                         | 1 (8)  | 1 (8)  | 0      | 0      | 2 (5) |

|                                     |        |        |        |        |       |
|-------------------------------------|--------|--------|--------|--------|-------|
| Erythema                            | 0      | 0      | 2 (12) | 0      | 2 (5) |
| Flushing                            | 0      | 0      | 2 (12) | 0      | 2 (5) |
| Hematochezia                        | 0      | 0      | 2 (12) | 0      | 2 (5) |
| Herpes simplex                      | 0      | 0      | 2 (12) | 0      | 2 (5) |
| Injection site bruising             | 1 (8)  | 1 (8)  | 0      | 1 (25) | 2 (5) |
| Insomnia                            | 0      | 0      | 2 (12) | 0      | 2 (5) |
| Joint stiffness                     | 1 (8)  | 1 (8)  | 0      | 0      | 2 (5) |
| Mouth ulceration                    | 1 (8)  | 1 (8)  | 0      | 0      | 2 (5) |
| Muscle cramp                        | 0      | 0      | 2 (12) | 0      | 2 (5) |
| Pain (not otherwise specific)       | 2 (17) | 0      | 0      | 0      | 2 (5) |
| Rash erythematous                   | 0      | 0      | 2 (12) | 0      | 2 (5) |
| Sinusitis (not otherwise specified) | 0      | 2 (17) | 0      | 0      | 2 (5) |

|                          |       |       |       |        |       |
|--------------------------|-------|-------|-------|--------|-------|
| Tooth abscess            | 1 (8) | 1 (8) | 0     | 0      | 2 (5) |
| Toothache                | 0     | 1 (8) | 1 (6) | 1 (25) | 2 (5) |
| Dysmenorrhea*            | 0     | 0     | 1 (8) | 0      | 1 (3) |
| Menorrhagia*             | 0     | 0     | 1 (8) | 0      | 1 (3) |
| Abdominal discomfort     | 0     | 1 (8) | 0     | 0      | 1 (2) |
| Abdominal pain upper     | 1 (8) | 0     | 0     | 1 (25) | 1 (2) |
| Anemia                   | 0     | 0     | 1 (6) | 0      | 1 (2) |
| Aphthous stomatitis      | 0     | 1 (8) | 0     | 0      | 1 (2) |
| Asthenia                 | 0     | 1 (8) | 0     | 0      | 1 (2) |
| Blood pressure increased | 0     | 0     | 1 (6) | 0      | 1 (2) |
| Cerebral hemorrhage      | 1 (8) | 0     | 0     | 0      | 1 (2) |

|                                                 |        |       |       |   |       |
|-------------------------------------------------|--------|-------|-------|---|-------|
| Cognitive disorder                              | 0      | 0     | 1 (6) | 0 | 1 (2) |
| Decreased appetite                              | 0      | 0     | 1 (6) | 0 | 1 (2) |
| Depressed mood                                  | 0      | 0     | 1 (6) | 0 | 1 (2) |
| Depression                                      | 0      | 0     | 1 (6) | 0 | 1 (2) |
| Diarrhea (not otherwise specified)              | 1 (8)  | 0     | 0     | 0 | 1 (2) |
| Ear hemorrhage                                  | 0      | 1 (8) | 0     | 0 | 1 (2) |
| Ejaculation disorder (not otherwise specified)* | 1 (25) | 0     | 0     | 0 | 1 (8) |
| Esophageal spasm                                | 0      | 0     | 1 (6) | 0 | 1 (2) |
| Eye hemorrhage (not otherwise specified)        | 1 (8)  | 0     | 0     | 0 | 1 (2) |
| Eye injury (not otherwise specified)            | 1 (8)  | 0     | 0     | 0 | 1 (2) |
| Feces discolored                                | 1 (8)  | 0     | 0     | 0 | 1 (2) |

|                                    |       |       |       |   |       |
|------------------------------------|-------|-------|-------|---|-------|
| Fibrosis (not otherwise specified) | 0     | 1 (8) | 0     | 0 | 1 (2) |
| Flatulence                         | 0     | 1 (8) | 0     | 0 | 1 (2) |
| Fungal infection                   | 0     | 0     | 1 (6) | 0 | 1 (2) |
| Gastroesophageal reflux disease    | 1 (8) | 0     | 0     | 0 | 1 (2) |
| Hematoma (not otherwise specified) | 1 (8) | 0     | 0     | 0 | 1 (2) |
| Hematuria                          | 0     | 0     | 1 (6) | 0 | 1 (2) |
| Hemoptysis                         | 0     | 0     | 1 (6) | 0 | 1 (2) |
| Hemorrhage                         | 0     | 0     | 1 (6) | 0 | 1 (2) |
| Hyperkeratosis                     | 0     | 1 (8) | 0     | 0 | 1 (2) |
| Hypoesthesia                       | 0     | 1 (8) | 0     | 0 | 1 (2) |
| Joint dislocation                  | 0     | 0     | 1 (6) | 0 | 1 (2) |
| Joint swelling                     | 0     | 1 (8) | 0     | 0 | 1 (2) |

|                         |       |        |       |        |       |
|-------------------------|-------|--------|-------|--------|-------|
| Laryngitis              | 0     | 0      | 1 (6) | 0      | 1 (2) |
| Lethargy                | 0     | 0      | 1 (6) | 0      | 1 (2) |
| Lipodystrophy acquired  | 0     | 1 (8)  | 0     | 0      | 1 (2) |
| Loose stools            | 0     | 0      | 1 (6) | 0      | 1 (2) |
| Menstruation irregular* | 0     | 1 (11) | 0     | 0      | 1 (3) |
| Migraine                | 0     | 0      | 1 (6) | 0      | 1 (2) |
| Muscle spasms           | 0     | 1 (8)  | 0     | 0      | 1 (2) |
| Myalgia                 | 0     | 1 (8)  | 0     | 0      | 1 (2) |
| Nail bed bleeding       | 0     | 0      | 1 (6) | 0      | 1 (2) |
| Nasopharyngitis         | 0     | 1 (8)  | 0     | 0      | 1 (2) |
| Neck pain               | 1 (8) | 0      | 0     | 1 (25) | 1 (2) |

|                        |       |        |       |        |       |
|------------------------|-------|--------|-------|--------|-------|
| Oral mucosal petechiae | 0     | 1 (8)  | 0     | 0      | 1 (2) |
| Osteopenia             | 0     | 1 (8)  | 0     | 0      | 1 (2) |
| Paraesthesia           | 1 (8) | 0      | 0     | 0      | 1 (2) |
| Premenstrual syndrome* | 0     | 1 (11) | 0     | 0      | 1 (3) |
| Pruritus               | 0     | 0      | 1 (6) | 0      | 1 (2) |
| Pyrexia                | 0     | 1 (8)  | 0     | 0      | 1 (2) |
| Rash                   | 0     | 0      | 1 (6) | 0      | 1 (2) |
| Rash papular           | 0     | 0      | 1 (6) | 0      | 1 (2) |
| Rash scaly             | 0     | 0      | 1 (6) | 0      | 1 (2) |
| Rectal hemorrhage      | 0     | 0      | 1 (6) | 2 (50) | 1 (2) |
| Retinal hemorrhage     | 0     | 1 (8)  | 0     | 0      | 1 (2) |

|                                           |       |       |       |   |       |
|-------------------------------------------|-------|-------|-------|---|-------|
| Rigors                                    | 1 (8) | 0     | 0     | 0 | 1 (2) |
| Scoliosis                                 | 0     | 1 (8) | 0     | 0 | 1 (2) |
| Sinus headache                            | 0     | 1 (8) | 0     | 0 | 1 (2) |
| Sinusitis                                 | 0     | 0     | 1 (6) | 0 | 1 (2) |
| Sinusitis acute (not otherwise specified) | 1 (8) | 0     | 0     | 0 | 1 (2) |
| Skin laceration                           | 0     | 1 (8) | 0     | 0 | 1 (2) |
| Skin ulcer                                | 0     | 0     | 1 (6) | 0 | 1 (2) |
| Sleep disorder                            | 0     | 0     | 1 (6) | 0 | 1 (2) |
| Tachycardia (not otherwise specified)     | 0     | 1 (8) | 0     | 0 | 1 (2) |
| Thermal burn                              | 0     | 0     | 1 (6) | 0 | 1 (2) |
| Tongue hemorrhage                         | 0     | 1 (8) | 0     | 0 | 1 (2) |

|                                                                      |       |       |       |        |       |
|----------------------------------------------------------------------|-------|-------|-------|--------|-------|
| Tremor                                                               | 0     | 0     | 1 (6) | 0      | 1 (2) |
| Upper respiratory tract infection<br>viral (not otherwise specified) | 1 (8) | 0     | 0     | 0      | 1 (2) |
| Urinary tract infection                                              | 0     | 0     | 1 (6) | 0      | 1 (2) |
| Varicose veins (not otherwise<br>specified)                          | 0     | 1 (8) | 0     | 0      | 1 (2) |
| Vascular insufficiency                                               | 0     | 1 (8) | 0     | 0      | 1 (2) |
| Vertigo                                                              | 1 (8) | 0     | 0     | 0      | 1 (2) |
| Vision blurred                                                       | 0     | 1 (8) | 0     | 0      | 1 (2) |
| Vomiting                                                             | 0     | 0     | 1 (6) | 0      | 1 (2) |
| Vomiting (not otherwise<br>specified)                                | 1 (8) | 0     | 0     | 0      | 1 (2) |
| Wound (not otherwise specified)                                      | 1 (8) | 0     | 0     | 0      | 1 (2) |
| Asthma                                                               | 0     | 0     | 0     | 1 (25) | 0     |

|                         |   |   |   |        |   |
|-------------------------|---|---|---|--------|---|
| Confusional state       | 0 | 0 | 0 | 1 (25) | 0 |
| Deep vein thrombosis    | 0 | 0 | 0 | 1 (25) | 0 |
| Eye hemorrhage          | 0 | 0 | 0 | 1 (25) | 0 |
| Flank pain              | 0 | 0 | 0 | 1 (25) | 0 |
| Hemorrhage intracranial | 0 | 0 | 0 | 1 (25) | 0 |
| Injection site pain     | 0 | 0 | 0 | 1 (25) | 0 |
| Mouth hemorrhage        | 0 | 0 | 0 | 1 (25) | 0 |

\*Proportions based on number of female (or male) patients
